# Supplementary material for: High expression of PSMC2 promotes gallbladder cancer through regulation of GNG4 and predicts poor prognosis
Source: PubMed Central journal article supplement (PMC8138011; doi:10.1038/s41389-021-00330-1), 2021-05-20
Supplement: 41389_2021_330_MOESM1_ESM.pdf [file 41389_2021_330_MOESM1_ESM.pdf]

Outlook 搜索 现在开会

使用 Microsoft 的新浏览器提高速度、安全并受到隐私保护。 立即下载

新建邮件 回复 删除 存档 垃圾邮件 整理 移至 分类 推迟

文件夹

- 收件箱 700
- 垃圾邮件 4
- 草稿 2
- 已发送邮件
- 已删除邮件
- 存档
- 便笺 2
- Notes
- 对话历史记录
- 新建文件夹

Re: add authors of this article

将消息翻译为 简体中文 | 始终不翻译 英语

白猫~ <394579360@qq.com>  
周三 2021/3/31 15:03  
收件人: 你

I agree with the decision to add Xing Gu as the co-first authors of this article.

---Original---

**From:** "精灵 精灵" <littlespirit1980@hotmail.com>  
**Date:** Wed, Mar 31, 2021 13:59 PM  
**To:** "394579360@qq.com" <394579360@qq.com>;  
**Subject:** add authors of this article

Our manuscript submitted to Oncogenesis 2020.4.29 (ONCSIS-20-0288), and reviewers' comments returned on 2020.5.9. As a lot of experiments and modifications were done by Xing Gu during the revision, we decided to add Xing Gu as the co-first authors of this article. The decision is agreed by all authors of this work.

答复 | 转发

Re: add authors of this article

将消息翻译为 简体中文 | 始终不翻译 英语

幽灵剑客 <410098547@qq.com>  
周三 2021/3/31 14:14  
收件人: 你

I agree with the decision to add Xing Gu as the co-first authors of this article.

---Original---

**From:** "精灵 精灵" <littlespirit1980@hotmail.com>  
**Date:** Wed, Mar 31, 2021 14:07 PM  
**To:** "410098547@qq.com" <410098547@qq.com>;"284409937@qq.com" <284409937@qq.com>;"yudandan@hust.edu.cn" <yudandan@hust.edu.cn>;  
**Subject:** add authors of this article

Our manuscript submitted to Oncogenesis 2020.4.29 (ONCSIS-20-0288), and reviewers' comments returned on 2020.5.9. As a lot of experiments and modifications were done by Xing Gu during the revision, we decided to add Xing Gu as the co-first authors of this article. The decision is agreed by all authors of this work.

答复 | 转发

Re: add authors of this article

将消息翻译为 简体中文 | 始终不翻译 英语

toji <284409937@qq.com>  
周三 2021/3/31 14:11  
收件人: 你

I agree with the decision to add Xing Gu as the co-first authors of this article.

---Original---

**From:** "精灵 精灵" <littlespirit1980@hotmail.com>  
**Date:** Wed, Mar 31, 2021 14:07 PM  
**To:** "410098547@qq.com" <410098547@qq.com>;"284409937@qq.com" <284409937@qq.com>;"yudandan@hust.edu.cn" <yudandan@hust.edu.cn>;  
**Subject:** add authors of this article

Our manuscript submitted to Oncogenesis 2020.4.29 (ONCSIS-20-0288), and reviewers' comments returned on 2020.5.9. As a lot of experiments and modifications were done by Xing Gu during the revision, we decided to add Xing Gu as the co-first authors of this article. The decision is agreed by all authors of this work.

答复 | 转发

← Re:add authors of this article

 将消息翻译为 简体中文 | 始终不翻译 英语

 于丹丹 <yudandan@hust.edu.cn>  
周三 2021/3/31 23:07  
收件人: 你

   ...

I agree with the decision to add Xing Gu as the co-first authors of this article.

---

发件人: "精灵 精灵" <littlespirit1980@hotmail.com>  
发送日期: 2021-03-31 14:07:14  
收件人: "410098547@qq.com" <410098547@qq.com>, "284409937@qq.com" <284409937@qq.com>, "yudandan@hust.edu.cn" <yudandan@hust.edu.cn>  
抄送人:  
主题: add authors of this article  
Our manuscript submitted to Oncogenesis 2020.4.29 (ONCSIS-20-0288), and reviewers' comments returned on 2020.5.9. As a lot of experiments and modifications were done by Xing Gu during the revision, we decided to add Xing Gu as the co-first authors of this article. The decision is agreed by all authors of this work.

[答复](#) | [转发](#)
